# Supplementary material for: Heterogeneous interactions between SO 2 and organic peroxides in submicron aerosol
Source: Copernicus journal article supplement (doi:10.5194/acp-21-6647-2021), 2021-05-04
Supplement: Supplementary file 1 [file acp-21-6647-2021-supplement.pdf]

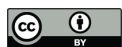

*Supplement of*

## **Heterogeneous interactions between SO<sub>2</sub> and organic peroxides in submicron aerosol**

**Shun Yao Wang et al.**

*Correspondence to:* Arthur W. H. Chan ([arthurwh.chan@utoronto.ca](mailto:arthurwh.chan@utoronto.ca))

The copyright of individual parts of the supplement might differ from the article licence.

## **S1. Quantification of sulfate formation for SOA experiments**

Particulate sulfate formation upon the reactive uptake of SO<sub>2</sub> onto different types of SOA was monitored using a compact time-of-flight aerosol mass spectrometer (C-ToF-AMS) (Aerodyne Research Inc., Billerica, USA). In this study, the ToF-AMS was operated in the Mass Spectrum (MS) mode with a chopper to regulate particle transmission for aerosol sulfate quantification (DeCarlo et al., 2006). The chopper where the aerosol beam passes is controlled to be alternatively blocked in order to have background corrections for quantification. An aerodynamic lens system selects the particles in a size range of ~35–1000 nm into the vacuum system. The sampling flow rate was 1.26 cm<sup>3</sup> s<sup>-1</sup>. After the sampling stream passing the sizing chamber, aerosol is vaporized on a heated porous tungsten surface (600 °C) and immediately ionized in electron impact (EI) mode at 70 eV. 300 nm ammonium nitrate (99.999%, Sigma-Aldrich) was used for AMS ionization efficiency (IE) calibration. The collection efficiency (CE) under humid condition was assumed to be 1. The relative ionization efficiency (RIE) of inorganic sulfate was determined to be 1.05 using ammonium sulfate (Canagaratna et al., 2007). The ions are extracted by an orthogonal extractor into the ToF-MS (V-mode), and the MS spectra acquisition was performed under positive mode. Data were analyzed by software “SQUIRREL 1.63” and “PIKA 1.23” in Igor Pro 6.37 (Wavemetrics, Oregon, USA).

For  $\gamma_{\text{SO}_2}$  measurements of toluene SOA, a strong hydrocarbon interference was observed with the SO<sub>2</sub> analyzer, possibly stemming from the high concentrations of gas-phase aromatic compounds. As a result, the uptake rate was instead estimated by measuring the sulfate production rate using AMS. However, it should also be noted that the sulfate collection and ionization efficiencies of AMS are highly uncertain, since the yield of organosulfate is significant from these reactions (Wang et al., 2019), and AMS has a lower sensitivity towards

organosulfates especially under humid conditions in the current study as indicated by ion chromatography and SMPS measurements (Fig.S10-12) (Chen et al., 2019;Farmer et al., 2010). Different RIE for different types of organosulfates were also observed in this study (Fig. S11). As a result,  $\gamma_{\text{SO}_2}$  of toluene SOA was estimated from rate of sulfate formation measured by AMS and corrected based on the ratio between sulfate formation and  $\text{SO}_2$  consumption of limonene SOA (Fig. S12).

## S2. Supplemental Table and Figures

Table S1. Summary of experiments in this study.

Figure S1. Schematic of measuring  $\gamma_{\text{SO}_2}$  onto ammonium sulfate or malonic acid mixed with peroxides.

Figure S2. Experimental schematic of measuring  $\gamma_{\text{SO}_2}$  onto SOA.

Figure S3. Potential  $\text{SO}_2$  loss by peroxides accumulated on the filter before the  $\text{SO}_2$  analyzer.

Figure S4. Investigating potential  $\text{SO}_2$  decay by losses inside the  $\text{SO}_2$  analyzer.

Figure S5. Contribution of wet ammonium sulfate aerosol to the observed  $\text{SO}_2$  decay.

Figure S6. Contribution of organic peroxide vapor to the observed  $\text{SO}_2$  decay.

Figure S7. Relationship between  $\gamma_{\text{SO}_2}$  and peroxide characteristics.

Figure S8. Comparison between measured  $\gamma_{\text{SO}_2}$  and predicted  $\gamma_{\text{SO}_2}$  in experiments.

Figure S9. Residuals (a) and residual distribution (b) for the multilinear regression.

Figure S10. (a) IC calibration curves for S (VI). (b) Comparison of sulfate quantified by AMS and IC.

Figure S11. Comparison of SMPS measured sulfate and AMS measured sulfate under dry and humid conditions (RH 80%) for both inorganic sulfate and organosulfates.

Figure S12. Time series of sulfate formation monitored by AMS for SOA experiments.

84 **Table S1. Summary of chamber experiments in this study**

| Expt.#                | Aerosol                                                    | Initial<br>SO <sub>2</sub><br>(ppb) | SO <sub>2</sub><br>decay<br>(ppb) | Surface area<br>concentration<br>( $\mu\text{m}^2 \text{ cm}^{-3}$ ) | $\gamma_{\text{SO}_2}^a$         | RH % |
|-----------------------|------------------------------------------------------------|-------------------------------------|-----------------------------------|----------------------------------------------------------------------|----------------------------------|------|
| <b>1</b>              | 25 mM ammonium sulfate                                     | 218                                 | -1                                | $7.8 \times 10^3$                                                    | $(-1.9 \pm 0.08) \times 10^{-7}$ | 52   |
| <b>2</b>              | 50 mM tert-Butyl hydroperoxide<br>+ 25 mM ammonium sulfate | 240                                 | 3                                 | $8.9 \times 10^3$                                                    | $(2.7 \pm 0.09) \times 10^{-6}$  | 44   |
| <b>3</b>              | 50 mM tert-Butyl hydroperoxide<br>+ 25 mM ammonium sulfate | 215                                 | 10                                | $7.5 \times 10^3$                                                    | $(1.4 \pm 0.07) \times 10^{-5}$  | 56   |
| <b>4</b>              | 50 mM tert-Butyl hydroperoxide<br>+ 25 mM ammonium sulfate | 250                                 | 47                                | $1.4 \times 10^4$                                                    | $(2.8 \pm 0.7) \times 10^{-5}$   | 67   |
| <b>5</b>              | 50 mM Cumene hydroperoxide<br>+25 mM ammonium sulfate      | 201                                 | 10                                | $2.9 \times 10^3$                                                    | $(1.2 \pm 0.09) \times 10^{-4}$  | 47   |
| <b>6</b>              | 50 mM Cumene hydroperoxide<br>+25 mM ammonium sulfate      | 167                                 | 7                                 | $2.0 \times 10^3$                                                    | $(1.5 \pm 0.3) \times 10^{-4}$   | 52   |
| <b>7</b>              | 50 mM Cumene hydroperoxide<br>+25 mM ammonium sulfate      | 207                                 | 39                                | $4.4 \times 10^3$                                                    | $(2.4 \pm 0.3) \times 10^{-4}$   | 61   |
| <b>8</b>              | 50 mM 2-Butanone peroxide<br>+25 mM ammonium sulfate       | 108                                 | 7                                 | $1.6 \times 10^3$                                                    | $(1.3 \pm 0.1) \times 10^{-3}$   | 25   |
| <b>9</b>              | 50 mM 2-Butanone peroxide<br>+25 mM ammonium sulfate       | 201                                 | 107                               | $7.4 \times 10^3$                                                    | $(3.1 \pm 0.2) \times 10^{-3}$   | 47   |
| <b>10<sup>b</sup></b> | 50 mM 2-Butanone peroxide<br>+25 mM ammonium sulfate       | 153                                 | 91                                | $3.5 \times 10^3$                                                    | $(7.9 \pm 0.4) \times 10^{-3}$   | 53   |
| <b>11<sup>b</sup></b> | 50 mM 2-Butanone peroxide<br>+25 mM ammonium sulfate       | 107                                 | 32                                | $1.7 \times 10^3$                                                    | $(6.2 \pm 0.7) \times 10^{-3}$   | 54   |

|                       |                                                                       |     |     |                   |                                 |    |
|-----------------------|-----------------------------------------------------------------------|-----|-----|-------------------|---------------------------------|----|
| <b>12<sup>b</sup></b> | 50 mM 2-Butanone peroxide<br>+25 mM ammonium sulfate                  | 98  | 33  | $1.1 \times 10^3$ | $(1.0 \pm 0.05) \times 10^{-2}$ | 55 |
| <b>13</b>             | 50 mM 2-Butanone peroxide<br>+25 mM ammonium sulfate                  | 176 | 73  | $1.8 \times 10^3$ | $(9.3 \pm 0.7) \times 10^{-3}$  | 62 |
| <b>14<sup>c</sup></b> | 50 mM 2-Butanone peroxide<br>+25 mM ammonium sulfate                  | 151 | 133 | $2.1 \times 10^3$ | $(2.7 \pm 0.4) \times 10^{-2}$  | 71 |
| <b>15</b>             | 100 mM 2-Butanone peroxide<br>+25 mM ammonium sulfate                 | 100 | 72  | $8.1 \times 10^2$ | $(4.8 \pm 1) \times 10^{-2}$    | 52 |
| <b>16</b>             | 25 mM 2-Butanone peroxide<br>+25 mM ammonium sulfate                  | 175 | 76  | $4.1 \times 10^3$ | $(4.2 \pm 0.4) \times 10^{-3}$  | 52 |
| <b>17</b>             | 5 mM 2-Butanone peroxide<br>+25 mM ammonium sulfate                   | 138 | 16  | $4.6 \times 10^3$ | $(8.0 \pm 0.4) \times 10^{-4}$  | 53 |
| <b>18</b>             | 0.5 mM 2-Butanone peroxide<br>+25 mM ammonium sulfate                 | 180 | 4   | $7.3 \times 10^3$ | $(8.3 \pm 0.4) \times 10^{-5}$  | 57 |
| <b>19</b>             | 100 mM 2-Butanone peroxide<br>+25 mM malonic acid                     | 113 | 68  | $3.3 \times 10^3$ | $(1.3 \pm 0.2) \times 10^{-2}$  | 52 |
| <b>20</b>             | 50 mM 2-Butanone peroxide<br>+25 mM malonic acid                      | 157 | 49  | $2.3 \times 10^3$ | $(5.1 \pm 0.7) \times 10^{-3}$  | 54 |
| <b>21</b>             | 25 mM 2-Butanone peroxide<br>+25 mM malonic acid                      | 186 | 32  | $2.0 \times 10^3$ | $(2.8 \pm 0.2) \times 10^{-3}$  | 54 |
| <b>22</b>             | 5 mM 2-Butanone peroxide<br>+25 mM malonic acid                       | 236 | 6   | $1.8 \times 10^3$ | $(4.6 \pm 0.5) \times 10^{-4}$  | 54 |
| <b>23</b>             | 5 mM 2-Butanone peroxide<br>+25 mM ammonium sulfate<br>+0.00002 M HCl | 157 | 25  | $4.5 \times 10^3$ | $(1.2 \pm 0.2) \times 10^{-3}$  | 53 |

|           |                                          |     |    |                   |                                 |    |
|-----------|------------------------------------------|-----|----|-------------------|---------------------------------|----|
|           | 5 mM 2-Butanone peroxide                 |     |    |                   |                                 |    |
| <b>24</b> | +25 mM ammonium sulfate<br>+0.0001 M HCl | 152 | 21 | $3.4 \times 10^3$ | $(1.3 \pm 0.09) \times 10^{-3}$ | 54 |
|           | 5 mM 2-Butanone peroxide                 |     |    |                   |                                 |    |
| <b>25</b> | +25 mM ammonium sulfate<br>+0.001 M HCl  | 136 | 30 | $3.1 \times 10^3$ | $(2.5 \pm 0.4) \times 10^{-3}$  | 53 |
| <b>26</b> | $\alpha$ -Pinene SOA                     | 213 | 12 | $1.4 \times 10^3$ | $(5.7 \pm 0.4) \times 10^{-5}$  | 51 |
| <b>27</b> | Limonene SOA                             | 340 | 12 | $4.6 \times 10^3$ | $(2.4 \pm 0.1) \times 10^{-4}$  | 54 |
| <b>28</b> | Toluene SOA                              | -   | -  | $2.7 \times 10^3$ | $(8.3 \pm 0.4) \times 10^{-4}$  | 60 |

85

86 <sup>a</sup> Uncertainty of  $\gamma_{\text{SO}_2}$  in this study was estimated from  $\text{SO}_2$  and SMPS measurements. <sup>b</sup> The

87 reproducibility of the  $\gamma_{\text{SO}_2}$  measurements were estimated from Expt.10-12 to be 26 %. <sup>c</sup>  $\gamma_{\text{SO}_2}$

88 measured under high relative humidity condition was corrected by the  $\text{SO}_2$  repartitioning rate (Fig.

89 S6).





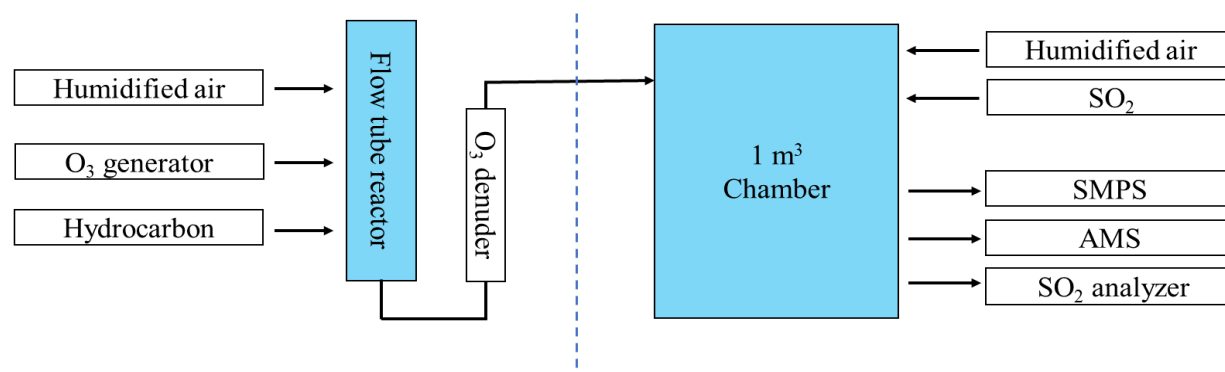

**Figure S2.** Experimental schematic of measuring  $\text{SO}_2$  reactive uptake coefficient onto different types of SOA. Secondary organic aerosol was generated in the flowtube reactor by photooxidation (toluene) or ozonolysis (limonene and  $\alpha$ -pinene). Excess amount of  $\text{O}_3$  was removed using an  $\text{O}_3$  denuder to avoid  $\text{SO}_2$  consumption caused by  $\text{O}_3$  inside the smog chamber.

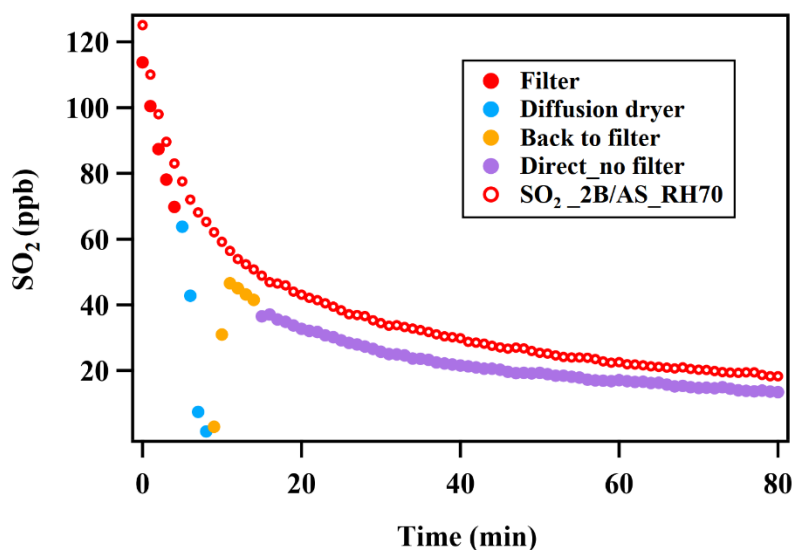

**Figure S3.** To test whether the observed SO<sub>2</sub> decay is caused by reactions with organic peroxide accumulated on the inline PTFE filter installed in front of the SO<sub>2</sub> analyzer, the first experiment (solid red circle) was conducted under the same condition of the second experiment (empty red circle), but the SO<sub>2</sub> measurement was taken with filter (red), through diffusion dryer (blue), back to filter (orange) and eventually direct measurement without filter (purple). Measurements taken with/without filter in front of the SO<sub>2</sub> analyzer show the same time series of SO<sub>2</sub> decay during the experiment, except when a diffusion dryer was placed inline (causing SO<sub>2</sub> loss by diffusion). These trends demonstrate that the observed SO<sub>2</sub> decay is not likely caused by reactions with organic peroxides accumulated on the PTFE filter in front of the SO<sub>2</sub> analyzer.

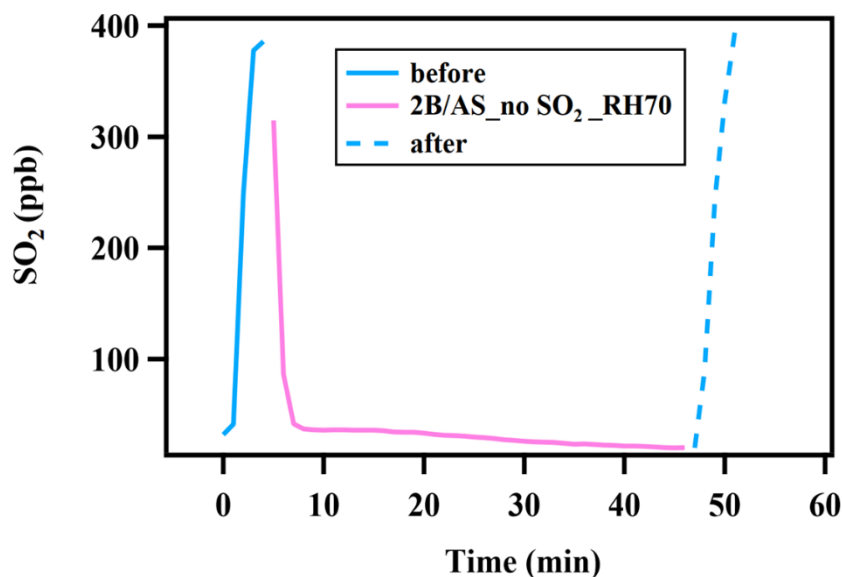

**Figure S4.** To test whether the observed SO<sub>2</sub> decay is caused by the organic peroxide trapped inside the analyzer during monitoring, SO<sub>2</sub> analyzer (Model 43i, Thermo Scientific) was directly connected to a stream of standard SO<sub>2</sub> gas with a constant SO<sub>2</sub> mixing ratio, and then switched to a chamber filled with organic peroxide-containing ammonium sulfate aerosol (no SO<sub>2</sub>) under RH 70% for 40 minutes. Eventually, the SO<sub>2</sub> analyzer was switched back to the standard SO<sub>2</sub> gas stream. The response of the SO<sub>2</sub> analyzer towards standard SO<sub>2</sub> gas shows similar rates before and after measuring organic peroxide-containing ammonium sulfate from the chamber, indicating the significant SO<sub>2</sub> decay observed in our study is not caused by any reaction inside the SO<sub>2</sub> analyzer.

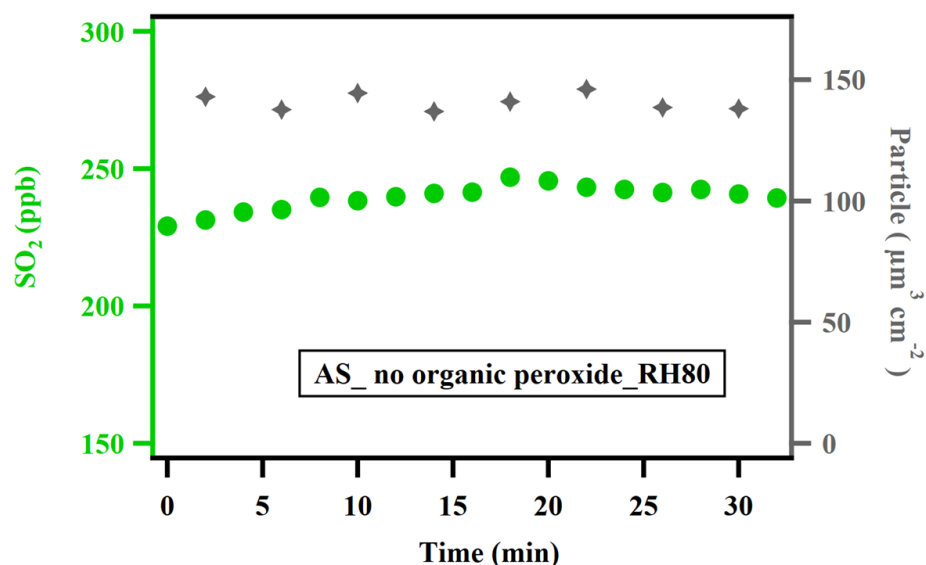

**Figure S5.** SO<sub>2</sub> time series in a blank control experiment. SO<sub>2</sub> was introduced into a chamber containing 140 µm<sup>3</sup> cm<sup>-3</sup> of ammonium sulfate aerosol with no organic peroxide at an RH of 80 %. No SO<sub>2</sub> decay was observed. Deliquesced ammonium sulfate aerosol is not a significant contributor to the decay of SO<sub>2</sub> under RH 80 % observed in chamber experiment, indicating the dominant sink of SO<sub>2</sub> during the other chamber experiment is the reaction with organic peroxides.

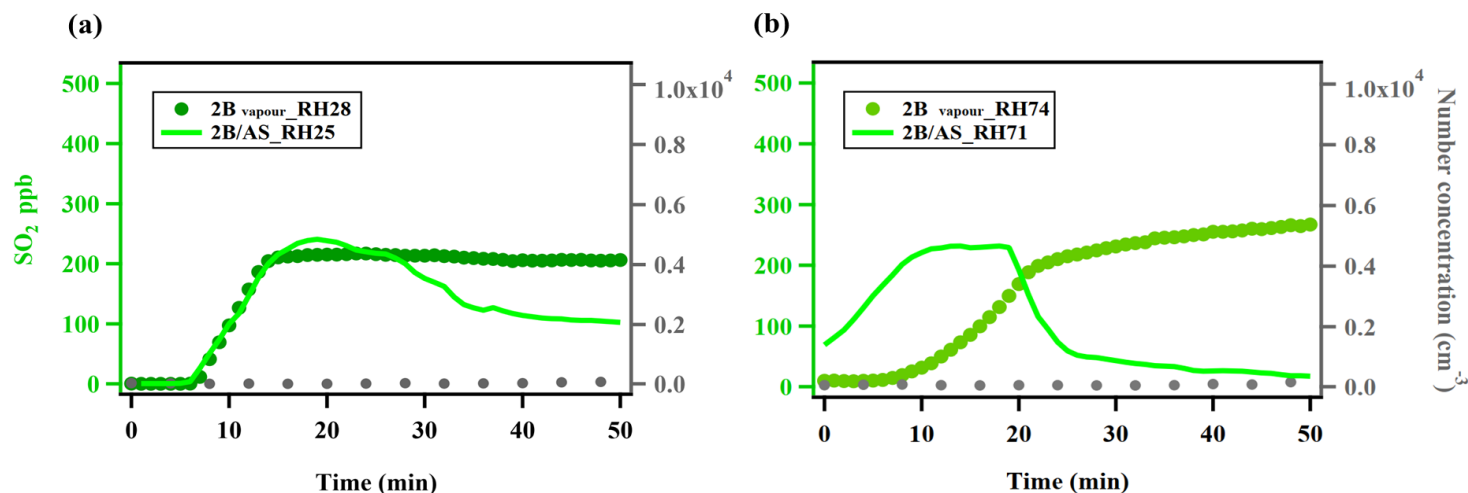

154

155 **Figure S6.** SO<sub>2</sub> consumption by 2-butanone organic peroxide vapor under dry (RH 28 %) and  
 156 humid (RH 74 %) condition during chamber experiment. Organic peroxide vapor was introduced  
 157 by placing an inline PTFE filter between the atomizer and chamber in order to remove particle-  
 158 phase peroxides. No significant SO<sub>2</sub> decay was observed when only organic peroxide vapor was  
 159 present under both dry and humidity conditions. For comparison, the SO<sub>2</sub> time series with  
 160 particulate organic peroxide-ammonium sulfate mixture showed significant SO<sub>2</sub> decay.  
 161 However, we noticed there was SO<sub>2</sub> repartitioning from the chamber wall under high RH (74 %),  
 162 and this SO<sub>2</sub> repartitioning rate was used to correct the  $\gamma_{\text{SO}_2}$  measured under high RH conditions  
 163 (above 70 %, Expt.14).

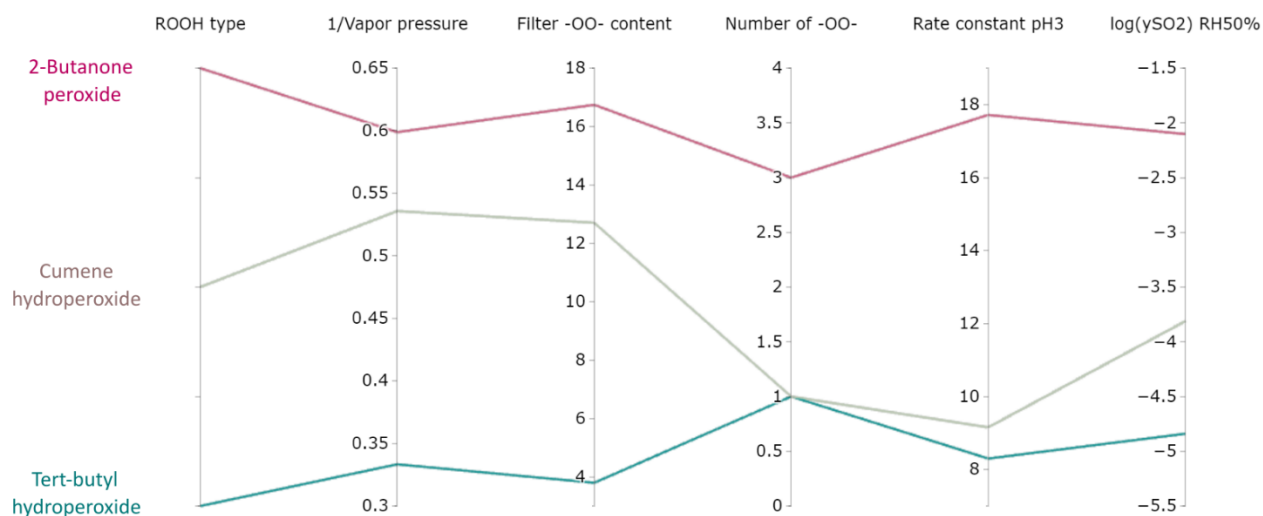

**Figure S7.** Visualization of organic peroxides' characteristics and  $\gamma_{SO2}$  for chamber experiments at RH 50% and a total peroxide to ammonium sulfate ratio of 2:1.  $\gamma_{SO2}$  is positively related with aqueous phase second order reaction rate constant ( $M^{-1} s^{-1}$ ) at pH 3 (which is associated with number of -OO- group) and with particulate -OO- content (%) on the filter (which is negatively associated with vapor pressure (kPa)).

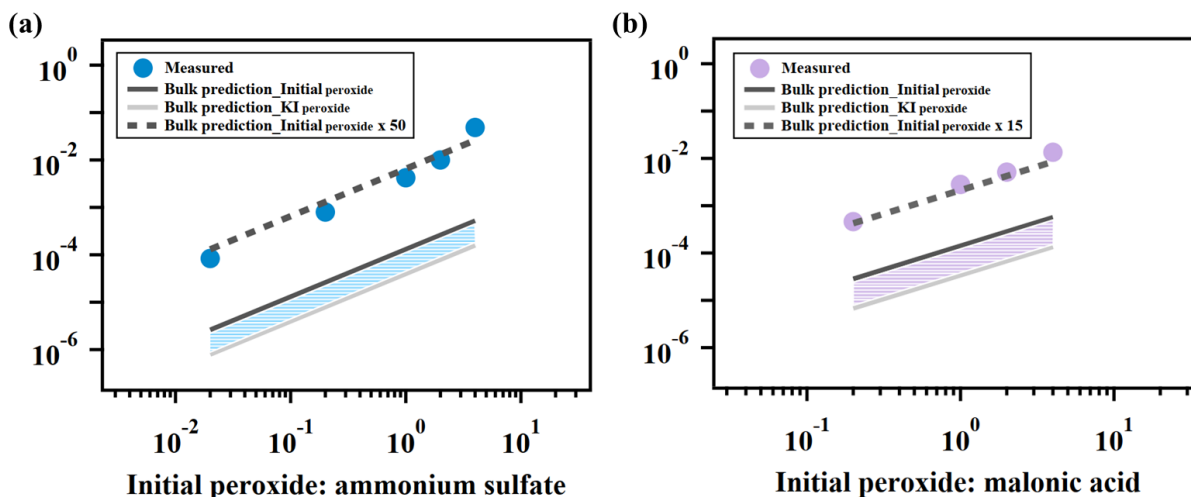

**Figure S8.** Comparison between measured  $\gamma_{SO_2}$  and predicted  $\gamma_{SO_2}$  for experiments with different peroxide to ammonium sulfate ratios (a) and peroxide to malonic acid ratios (b). The  $\gamma_{SO_2}$  predictions were made based on initial peroxide content assuming no partitioning and off-line KI measured peroxide content, respectively. The shadowed area is the uncertainty in  $\gamma_{SO_2}$  prediction in terms of particulate peroxide content. The discrepancy observed for ammonium sulfate aerosol (50 times) is larger than that of malonic acid (15 times) under the same experimental conditions.

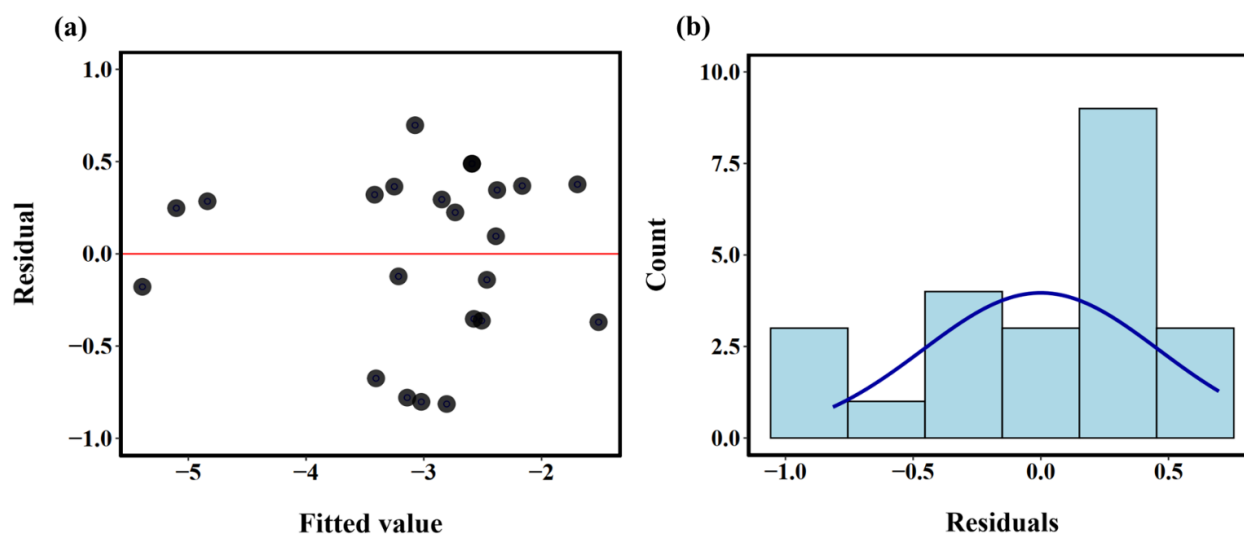

**Figure S9.** Residuals for individual data points of  $\log \gamma_{\text{SO}_2}$  (a) and the residual distribution (b) from the multilinear regression follows a normal distribution.



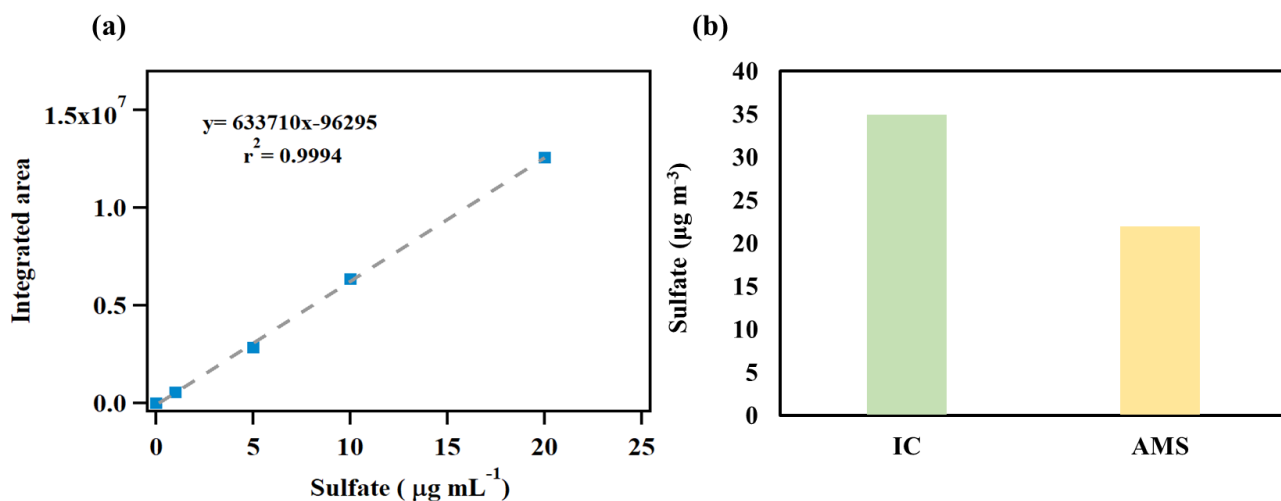

**Figure S10.** Comparison of sulfate measured by AMS and by ion chromatography (IC). Aerosol from the chamber  $\text{SO}_2$  uptake experiments was collected, extracted and measured by an IC (Perkin Elmer, USA). (a) IC calibration curve for  $\text{SO}_4^{2-}$ . (b) Sulfate quantification comparison between the off-line IC measurement and on-line AMS measurement. Results from AMS presents a lower sensitivity than IC in terms of quantifying total aerosol sulfate during the chamber experiment in this study.

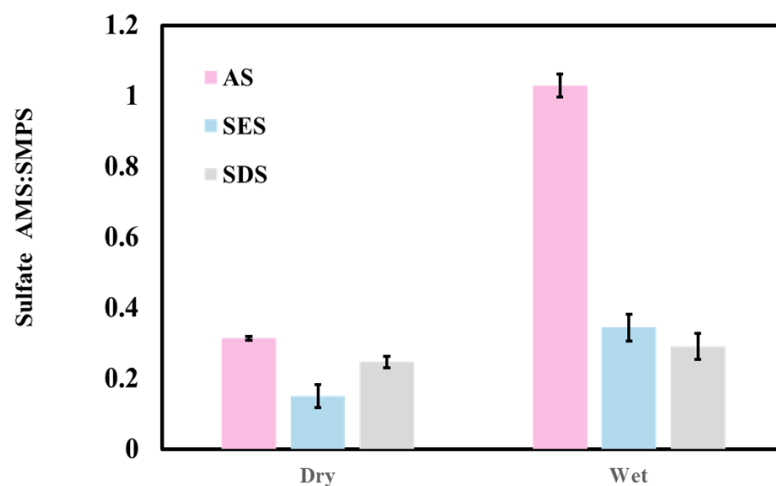

**Figure S11.** Comparison of SMPS measured sulfate and AMS measured sulfate under dry (with diffusion drier) and humid conditions (RH 80 %) for ammonium sulfate (**AS**), sodium ethyl sulfate (**SES**) and sodium dodecyl sulfate (**SDS**). AMS collection efficiencies for sulfate were considered to be 0.5 and 1 under dry and humid conditions, respectively (Matthew et al., 2008; Middlebrook et al., 2012). Under humid condition, the AMS quantified sulfate can be 3-5 times lower than the SMPS quantified sulfate in terms of organosulfate. The less effective response of AMS sulfate quantification towards organosulfate was also investigated in the work by Chen et al. (2019).

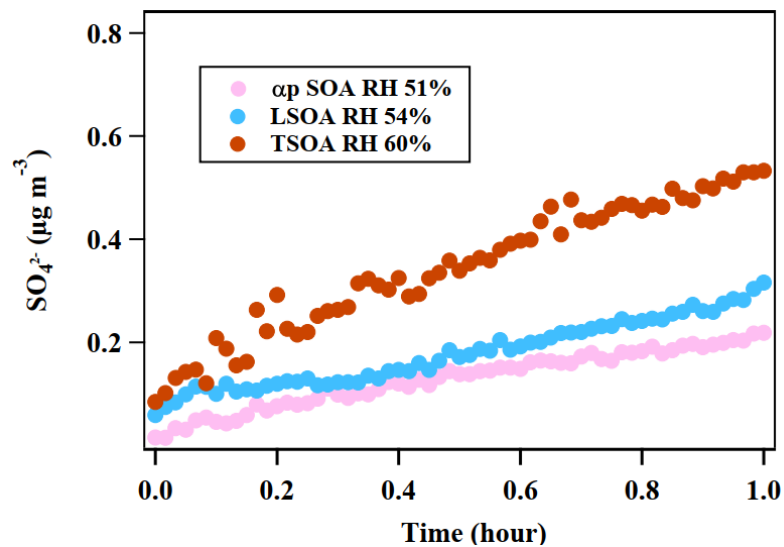

**Figure S12.** Time series of sulfate formation monitored by AMS during chamber experiments for the  $\alpha$  pinene SOA ( $\alpha$ p SOA), limonene SOA (LSOA) and toluene SOA (TSOA). The  $\gamma_{\text{SO}_2}$  of TSOA was estimated from the  $\gamma_{\text{SO}_2}$  of LSOA, and corrected by the sulfate formation ratio between the two SOA systems, where  $\frac{d_{\text{SO}_2\_TSOA}}{d_{\text{SO}_2\_LSOA}} = \frac{AMS_{\text{SO}_4\_TSOA}}{AMS_{\text{SO}_4\_LSOA}}$ .

## References

- Canagaratna, M. R., Jayne, J. T., Jimenez, J. L., Allan, J. D., Alfarra, M. R., Zhang, Q., Onasch, T. B., Drewnick, F., Coe, H., Middlebrook, A., Delia, A., Williams, L. R., Trimborn, A. M., Northway, M. J., DeCarlo, P. F., Kolb, C. E., Davidovits, P., and Worsnop, D. R.: Chemical and microphysical characterization of ambient aerosols with the Aerodyne aerosol mass spectrometer, *Mass Spectrom. Rev.*, 26, 185–222, 2007.
- Chen, Y., Xu, L., Humphry, T., Hettiyadura, A. P. S., Ovadnevaite, J., Huang, S., Poulain, L., Schroder, J. C., Campuzano-Jost, P., Jimenez, J. L., Herrmann, H., O'Dowd, C., Stone, E. A., and Ng, N. L.: Response of the Aerodyne aerosol mass spectrometer to inorganic sulfates and organosulfur compounds: applications in field and laboratory measurements, *Environ. Sci. Technol.*, 10.1021/acs.est.9b00884, 53, 5176–5186, 2019.
- DeCarlo, P. F., Kimmel, J. R., Trimborn, A., Northway, M. J., Jayne, J. T., Aiken, A. C., Gonin, M., Fuhrer, K., Horvath, T., Docherty, K. S., Worsnop, D. R., and Jimenez, J. L.: Field-deployable, high-resolution, time-of-flight aerosol mass spectrometer, *Anal. Chem.*, 78, 8281–8289, 2006.
- Farmer, D. K., Matsunaga, A., Docherty, K. S., Surratt, J. D., Seinfeld, J. H., and Ziemann, P. J.: Response of an aerosol mass spectrometer to organonitrates and organosulfates and implications for atmospheric chemistry. *Proc. Natl. Acad. Sci. U.S.A.* 107, 6670–6675, doi:10.1073/pnas.0912340107, 2010.
- Matthew, B. M., Middlebrook, A. M., and Onasch, T. B.: Collection efficiencies in an aerodyne 10 aerosol mass spectrometer as a function of particle phase for laboratory generated aerosols, *Aerosol Sci. Tech.*, 42, 884–898, 2008.
- Middlebrook, A. M., Bahreini, R., Jimenez, J. L., and Canagaratna, M. R.: Evaluation of composition-dependent collection efficiencies for the aerodyne aerosol mass spectrometer using field data, *Aerosol Sci. Tech.*, 46, 258–271, 2011.
- Wang, S., Zhou, S., Tao, Y., Tsui, W. G., Ye, J., Yu, J. Z., Murphy, J. G., McNeill, V. F., Abbatt, J. P. D., and Chan, A. W. H.: Organic peroxides and sulfur dioxide in aerosol: Source of particulate sulfate, *Environ. Sci. Technol.*, 53, 10695–10704, 10.1021/acs.est.9b02591, 2019.
